# Supplementary material
Source: publisher figshare collection journal article supplement (https://acs.figshare.com/ndownloader/files/25189362)
Supplement: Supplementary file 1 [file 25189362]

# Supporting Information

## Gold Nanoparticle-Redox Ionic Liquid based Nanoconjugated Matrix as a Novel Multifunctional Biosensing Interface

*Kandaswamy Theyagarajan<sup>a</sup>, Sangeeta Yadav<sup>b,c</sup>, Jitendra Satija<sup>c</sup>, Kathavarayan*

*Thenmozhi<sup>a\*</sup> and Sellappan Senthilkumar<sup>a\*</sup>*

<sup>a</sup>Department of Chemistry, School of Advanced Sciences, Vellore Institute of Technology (VIT), Vellore-632014, India.

<sup>b</sup>School of Biosciences and Technology, Vellore Institute of Technology (VIT), Vellore-632014, India.

<sup>c</sup>Centre for Nanobiotechnology, Vellore Institute of Technology (VIT), Vellore-632014, India.

\*Corresponding Authors:

Email: kt.thenmozhi@gmail.com; k.thenmozhi@vit.ac.in (Kathavarayan Thenmozhi)

Email: senthilanalytical@gmail.com; senthilkumar.s@vit.ac.in (Sellappan

Senthilkumar)

Number of pages : 5

Number of figures : 6

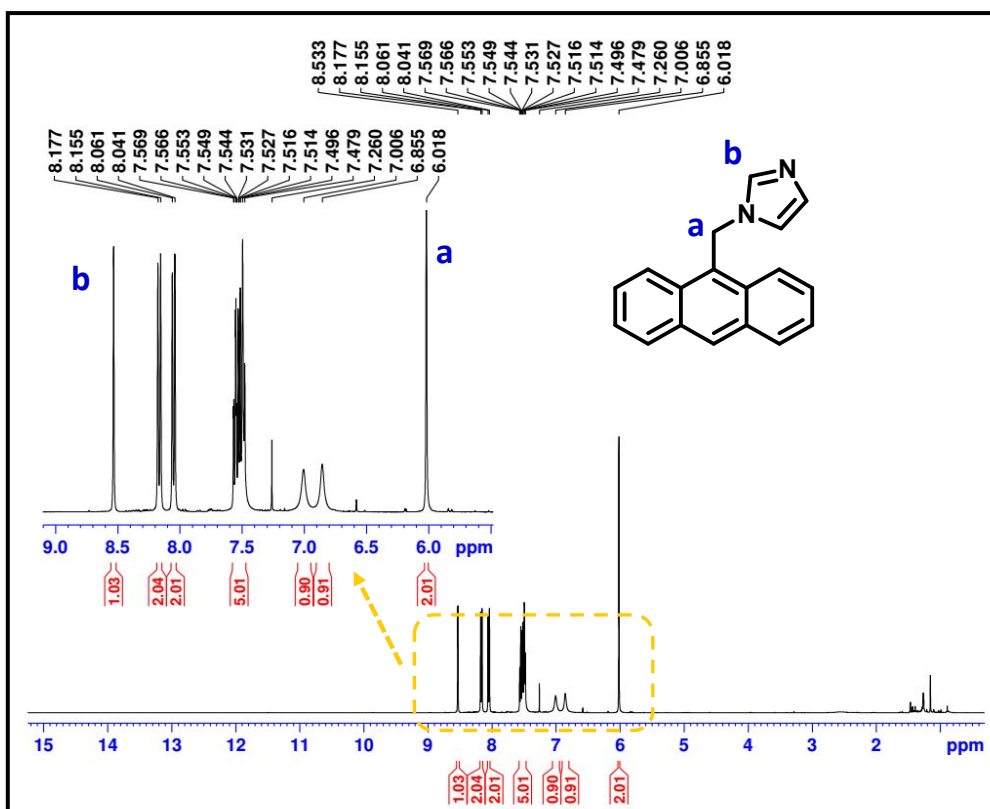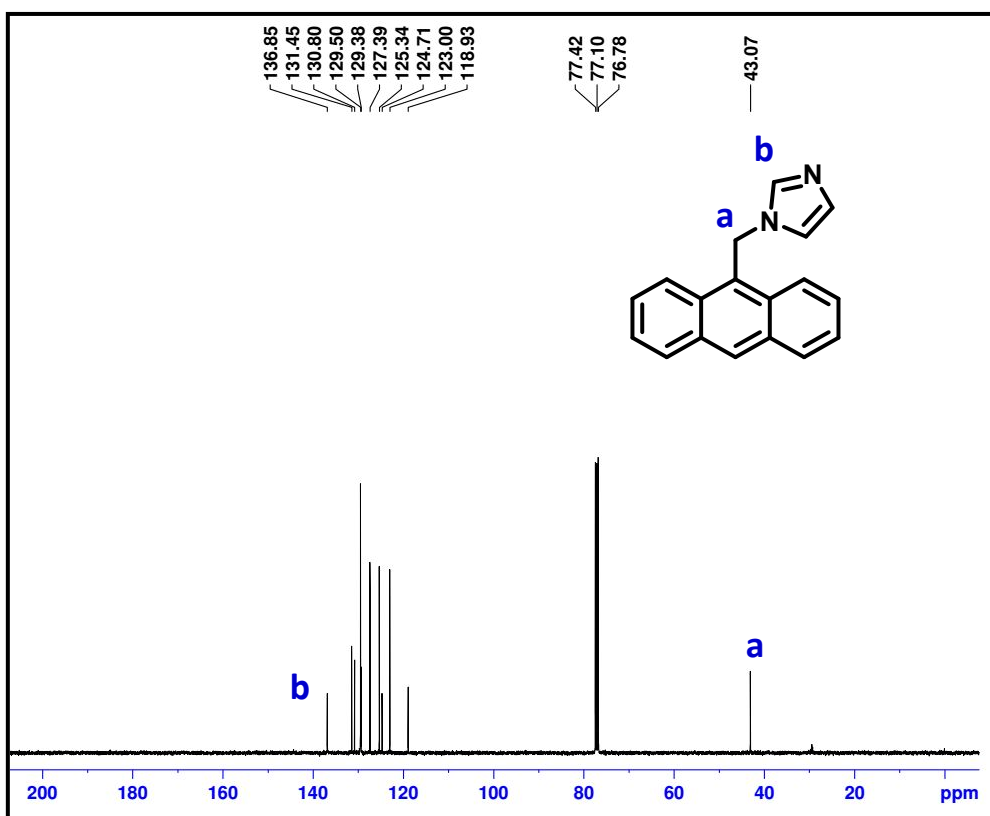

**Fig. S1** <sup>1</sup>H and <sup>13</sup>C NMR spectra of 1-(anthracen-9-ylmethyl)-1H-imidazole

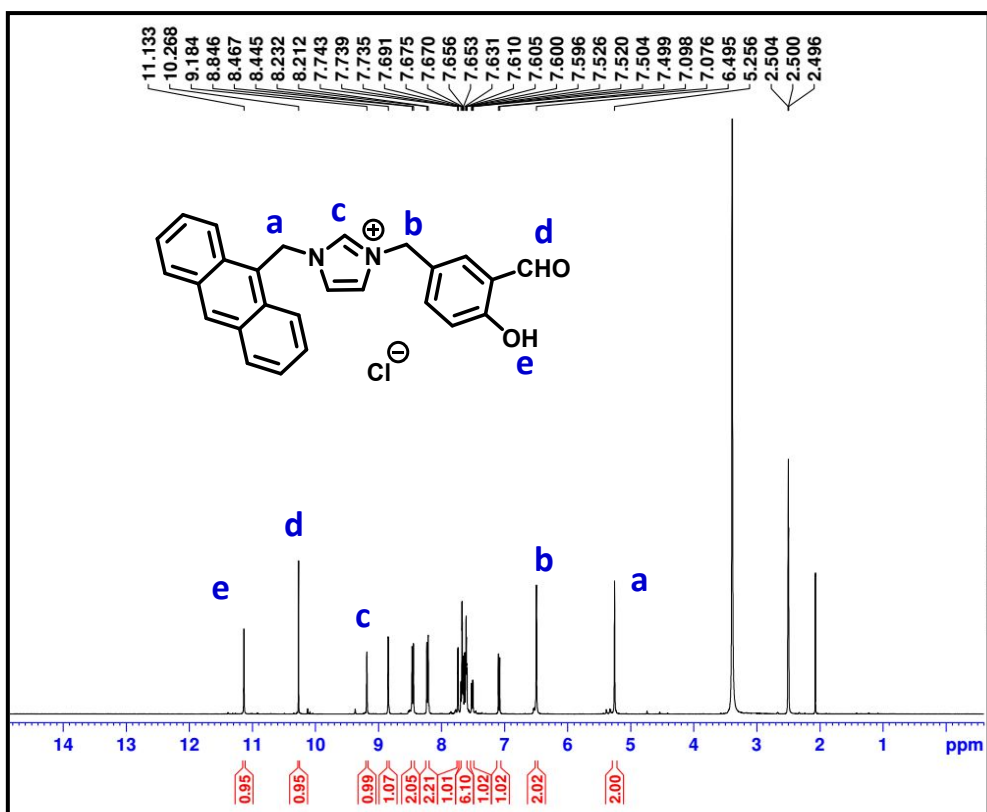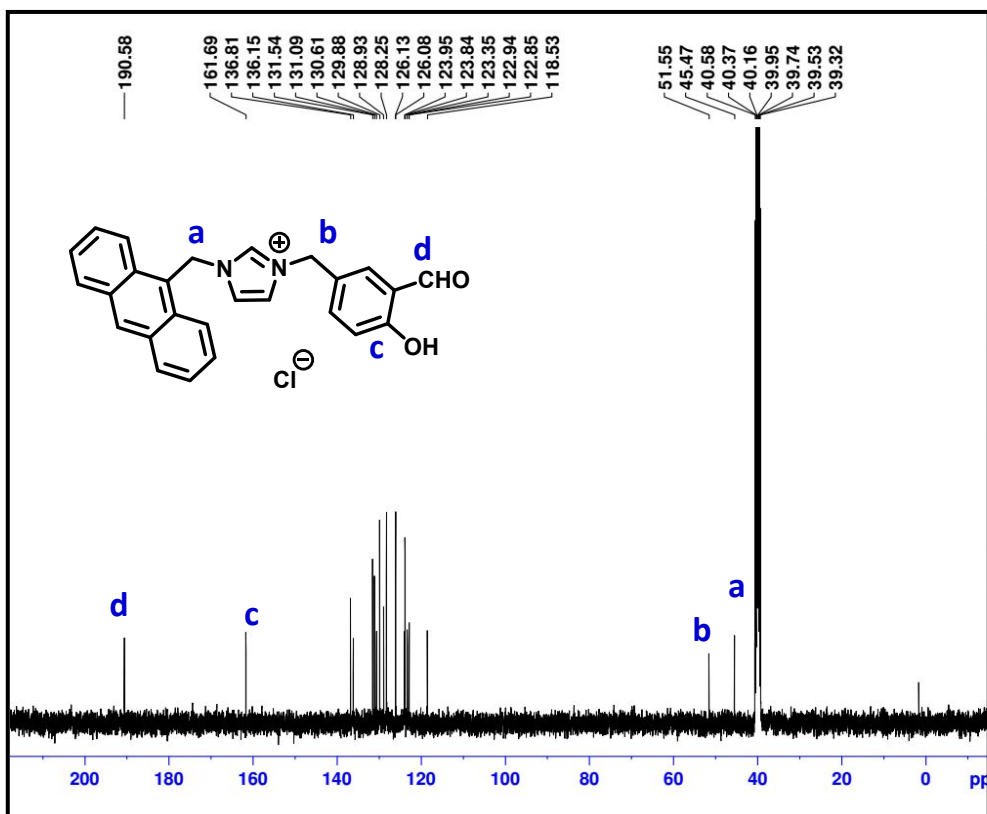

Fig. S2 <sup>1</sup>H and <sup>13</sup>C NMR spectra of CHO-AIL

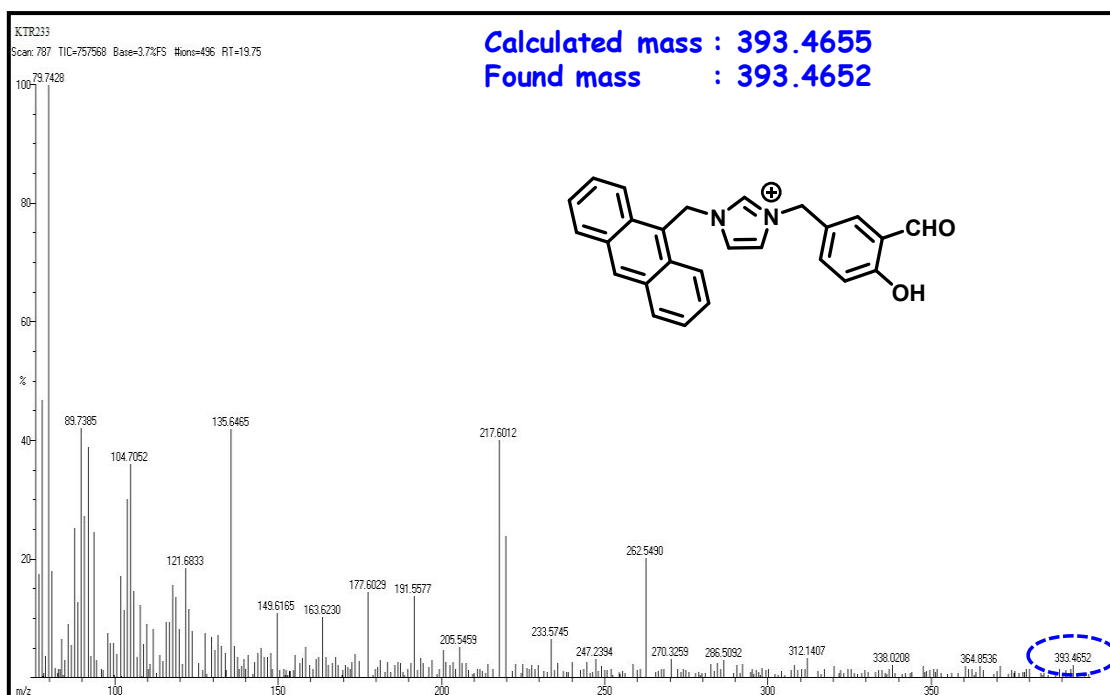

Fig. S3 HRMS spectrum of CHO-AIL

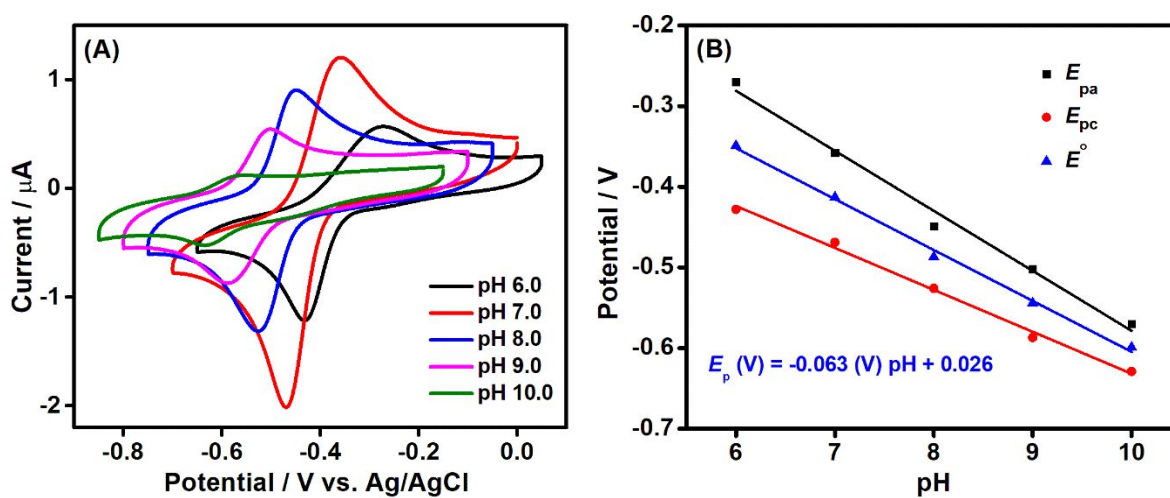

Fig. S4 (A) CVs of the fabricated biosensor in different pH and (B) Corresponding linear plot of peak potentials vs pH.

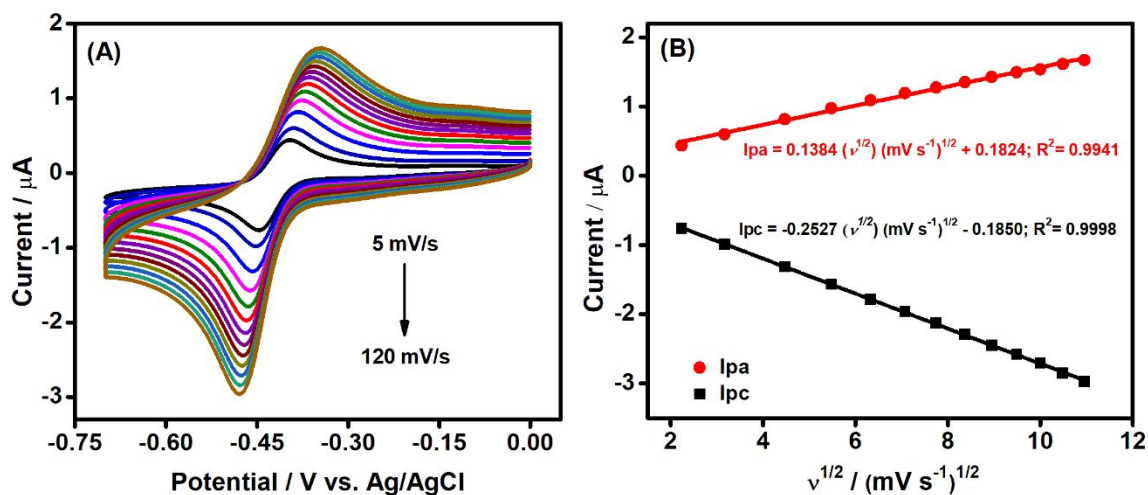

**Fig. S5** (A) Effect of scan rate on the current response of fabricated biosensor and (B) Corresponding linear plot of peak current vs. square root of scan rate.

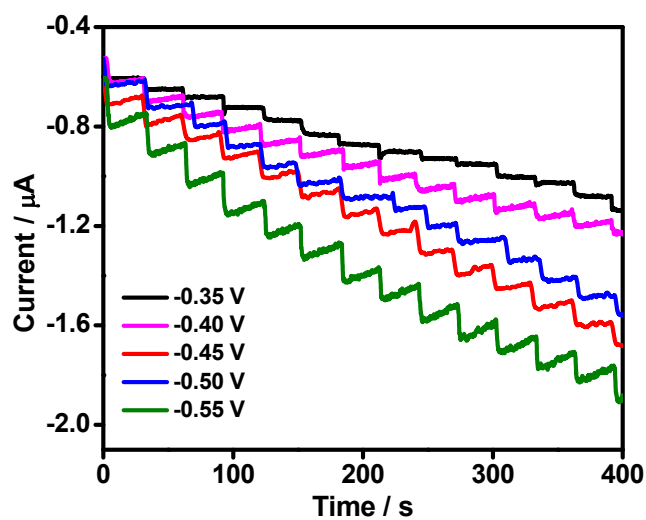

**Fig. S6** Amperometric response of the fabricated biosensor for the successive additions of  $\text{H}_2\text{O}_2$  in different operating potentials under constant stirring (350 rpm).
